# Supplementary material for: Export flux of unprocessed atmospheric nitrate from temperate forested catchments: a possible new index for nitrogen saturation
Source: Copernicus journal article supplement (doi:10.5194/bg-15-7025-2018), 2018-11-22
Supplement: Supplementary file 1 [file bg-15-7025-2018-supplement.zip]

Archive with 3 entries (3 files):
- bg-15-7025-2018-supplement-title-page.pdf
- Nakagawa_data.pdf
- bg-2018-258-supplement.pdf
