# Supplementary material for: Export flux of unprocessed atmospheric nitrate from temperate forested catchments: a possible new index for nitrogen saturation
Source: Copernicus journal article supplement (doi:10.5194/bg-15-7025-2018), 2018-11-22
Supplement: Supplementary file 1 [file bg-15-7025-2018-supplement.zip › bg-15-7025-2018-supplement-title-page.pdf]

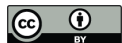

## *Supplement of*

# **Export flux of unprocessed atmospheric nitrate from temperate forested catchments: a possible new index for nitrogen saturation**

**F. Nakagawa et al.**

*Correspondence to:* Urumu Tsunogai ([urumu@nagoya-u.jp](mailto:urumu@nagoya-u.jp))

- [bg-15-7025-2018-supplement-title-page.pdf](#)
- [Nakagawa\\_data.pdf](#)
- [bg-2018-258-supplement.pdf](#)

The copyright of individual parts of the supplement might differ from the CC BY 4.0 License.
