# Supplementary material for: Export flux of unprocessed atmospheric nitrate from temperate forested catchments: a possible new index for nitrogen saturation
Source: Copernicus journal article supplement (doi:10.5194/bg-15-7025-2018), 2018-11-22
Supplement: Supplementary file 1 [file bg-15-7025-2018-supplement.zip › bg-2018-258-supplement.pdf]

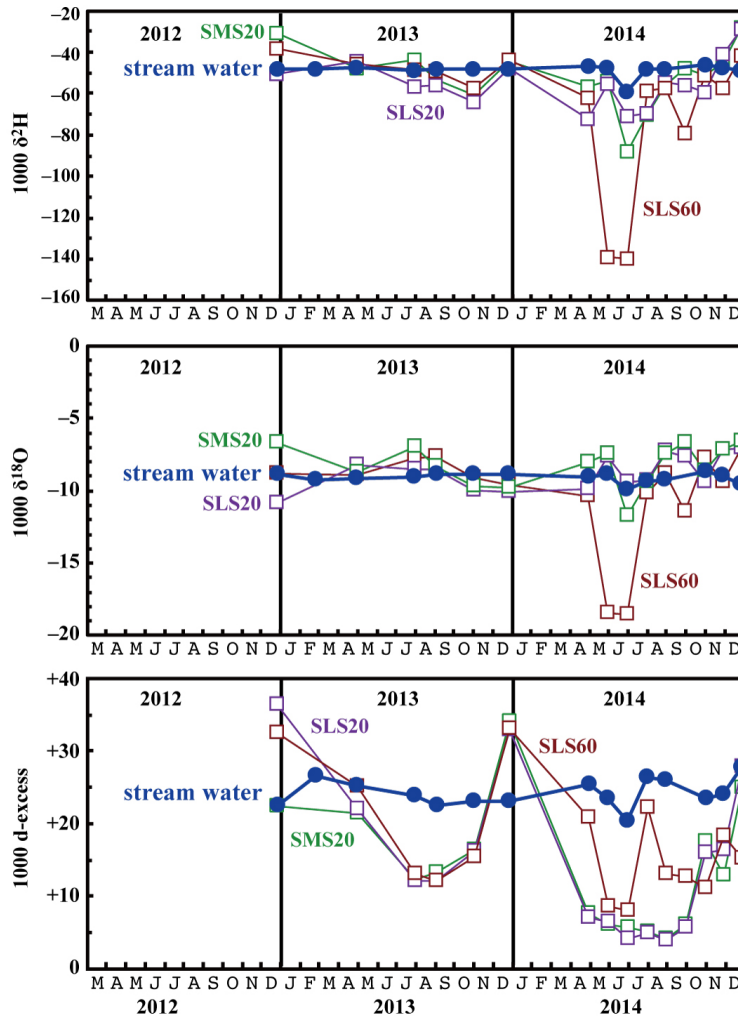

**Figure S1: Temporal variations in the values of  $\delta^2H$  (a),  $\delta^{18}O$  (b), and d-excess (c) of stream water (blue circles) and soil water (SMS20: green squares, SLS20: purple squares, SLS60: brown squares) at the site KJ.**
