# Supplementary material for: Export flux of unprocessed atmospheric nitrate from temperate forested catchments: a possible new index for nitrogen saturation
Source: Copernicus journal article supplement (doi:10.5194/bg-15-7025-2018), 2018-11-22
Supplement: Supplementary file 1 [file bg-15-7025-2018-supplement.zip › Nakagawa_data.pdf]

JJI stream

| start            | end              | flow rate | temp | pH   | EC   | SO4               | NO3               | Cl                | Na                | Ca                | Mg                | K                 | NH4               | $\delta^{15}\text{N}(\text{NO}_3^-)$ | $\delta^{18}\text{O}(\text{NO}_3^-)$ | $\Delta^{17}\text{O}(\text{NO}_3^-)$ | $\delta^2\text{H}(\text{H}_2\text{O})$ | $\delta^{18}\text{O}(\text{H}_2\text{O})$ |
|------------------|------------------|-----------|------|------|------|-------------------|-------------------|-------------------|-------------------|-------------------|-------------------|-------------------|-------------------|--------------------------------------|--------------------------------------|--------------------------------------|----------------------------------------|-------------------------------------------|
|                  |                  | L/min     | °C   |      | mS/m | $\mu\text{mol/L}$ | /10 <sup>3</sup>                     | /10 <sup>3</sup>                     | /10 <sup>3</sup>                     | /10 <sup>3</sup>                       | /10 <sup>3</sup>                          |
| 2011/12/26 14:10 | 2012/01/10 14:00 | 5.524     | 6.5  | 6.96 | 4.51 | 162.1             | 28.1              | 56.4              | 95.8              | 139.4             | 111.5             | 5.2               | 0.6               |                                      |                                      |                                      |                                        |                                           |
| 2012/01/10 14:00 | 2012/01/23 13:40 | 5.709     | 7    | 6.97 | 4.55 | 161.0             | 32.6              | 55.6              | 92.5              | 142.5             | 111.1             | 5.3               | 0.0               |                                      |                                      |                                      |                                        |                                           |
| 2012/01/23 13:40 | 2012/02/06 13:50 | 5.524     | 4.5  | 6.88 | 4.53 | 161.3             | 27.3              | 56.6              | 94.0              | 145.2             | 114.9             | 5.2               | 1.7               |                                      |                                      |                                      |                                        |                                           |
| 2012/02/06 13:50 | 2012/02/20 13:20 | 5.524     | 5.5  | 6.93 | 4.29 | 147.5             | 31.3              | 56.2              | 90.2              | 136.4             | 115.2             | 5.1               | 1.5               |                                      |                                      |                                      |                                        |                                           |
| 2012/02/20 13:20 | 2012/03/05 14:00 | 24.396    | 8    | 6.70 | 3.54 | 112.8             | 56.3              | 45.8              | 65.6              | 108.8             | 101.3             | 6.2               | 0.3               | -0.66                                | +2.84                                | +1.09                                | -9.21                                  | -53.18                                    |
| 2012/03/05 14:00 | 2012/03/19 14:10 | 4.580     | 8    | 6.86 | 3.95 | 130.2             | 33.2              | 55.7              | 80.9              | 120.7             | 112.0             | 5.8               | 0.4               | +0.53                                | +6.48                                | +1.55                                | -8.65                                  | -51.13                                    |
| 2012/03/19 14:10 | 2012/04/03 13:50 | 23.839    | 9    | 6.86 | 3.65 | 119.5             | 32.1              | 59.0              | 77.1              | 112.8             | 103.0             | 7.1               | 1.0               |                                      |                                      |                                      |                                        |                                           |
| 2012/04/03 13:50 | 2012/04/16 13:30 | 9.810     | 11   | 7.06 | 3.89 | 122.3             | 29.2              | 59.6              | 83.6              | 120.0             | 112.9             | 6.5               | 1.1               |                                      |                                      |                                      |                                        |                                           |
| 2012/04/16 13:30 | 2012/05/01 13:40 | 9.019     | 13.5 | 7.05 | 4.00 | 126.3             | 28.8              | 58.5              | 86.1              | 126.0             | 116.5             | 7.1               | 1.1               | +0.15                                | +6.72                                | +1.95                                | -8.44                                  | -49.87                                    |
| 2012/05/01 13:40 | 2012/05/14 13:40 | 3.546     | 14   | 7.06 | 4.23 | 148.2             | 25.3              | 60.7              | 93.1              | 135.6             | 125.4             | 7.2               | 0.7               | -0.48                                | +6.15                                | +1.73                                | -8.51                                  | -50.17                                    |
| 2012/05/14 13:40 | 2012/05/28 13:40 | 4.040     | 14.5 | 6.88 | 4.52 | 144.8             | 23.5              | 60.3              | 95.0              | 144.0             | 130.2             | 7.3               | 0.2               |                                      |                                      |                                      |                                        |                                           |
| 2012/05/28 13:40 | 2012/06/11 13:30 | 3.283     | 16   | 6.85 | 4.77 | 161.2             | 37.8              | 55.8              | 96.1              | 150.6             | 136.2             | 7.7               | 0.0               |                                      |                                      |                                      |                                        |                                           |
| 2012/06/11 13:30 | 2012/06/25 14:10 | 12.468    | 16   | 6.91 | 3.76 | 111.0             | 24.0              | 53.6              | 80.8              | 116.2             | 106.6             | 7.3               | 0.3               | +0.25                                | +7.41                                | +2.77                                | -8.68                                  | -51.78                                    |
| 2012/06/25 14:10 | 2012/07/09 14:00 | 14.491    | 17.5 | 6.92 | 3.71 | 113.1             | 26.4              | 52.8              | 80.4              | 116.0             | 106.6             | 6.8               | 0.3               |                                      |                                      |                                      |                                        |                                           |
| 2012/07/09 14:00 | 2012/07/30 13:50 | 4.742     | 20   | 6.97 | 3.82 | 117.7             | 23.5              | 56.9              | 85.0              | 120.3             | 110.3             | 7.4               | 0.3               |                                      |                                      |                                      |                                        |                                           |
| 2012/07/30 13:50 | 2012/08/13 14:10 | 6.492     | 21   | 6.99 | 4.42 | 142.9             | 31.9              | 58.1              | 95.3              | 142.8             | 128.5             | 8.4               | 0.5               | -2.22                                | +3.95                                | +1.75                                | -8.59                                  | -52.00                                    |
| 2012/08/13 14:10 | 2012/08/27 13:40 | 4.421     | 20.5 | 7.04 | 4.10 | 127.5             | 28.2              | 55.5              | 89.9              | 132.3             | 120.5             | 7.8               | 0.6               | +0.57                                | +6.74                                | +2.01                                | -8.42                                  | -51.41                                    |
| 2012/08/27 13:40 | 2012/09/10 14:10 | 5.898     | 20.5 | 7.05 | 4.41 | 136.6             | 41.4              | 53.6              | 89.0              | 143.9             | 128.6             | 8.1               | 0.0               |                                      |                                      |                                      |                                        |                                           |
| 2012/09/10 14:10 | 2012/09/24 14:10 | 8.152     | 17.5 | 6.91 | 3.79 | 111.8             | 30.8              | 54.2              | 80.8              | 119.6             | 110.1             | 6.8               | 0.6               |                                      |                                      |                                      |                                        |                                           |
| 2012/09/24 14:10 | 2012/10/09 14:10 | 4.266     | 16.5 | 7.04 | 4.11 | 129.4             | 27.2              | 56.2              | 87.4              | 129.8             | 118.3             | 6.8               | 0.6               | +0.23                                | +5.54                                | +1.52                                | -8.38                                  | -50.38                                    |
| 2012/10/09 14:10 | 2012/10/22 14:10 | 2.365     | 15   | 6.95 | 4.32 | 145.8             | 31.7              | 57.5              | 92.2              | 137.5             | 125.2             | 6.9               | 4.1               | +0.43                                | +3.19                                | +1.19                                | -8.33                                  | -49.97                                    |
| 2012/10/22 14:10 | 2012/11/05 14:50 | 2.167     | 13   | 6.99 | 4.42 | 158.3             | 31.3              | 57.9              | 92.9              | 141.9             | 129.4             | 6.5               | 0.9               |                                      |                                      |                                      |                                        |                                           |
| 2012/11/05 14:50 | 2012/11/19 14:00 | 3.753     | 10.5 | 6.95 | 4.41 | 143.9             | 45.0              | 56.9              | 91.1              | 141.6             | 127.1             | 6.2               | 0.3               |                                      |                                      |                                      |                                        |                                           |
| 2012/11/19 14:00 | 2012/12/03 13:50 | 2.469     | 9    | 6.92 | 4.43 | 158.0             | 30.6              | 56.6              | 93.9              | 140.0             | 126.9             | 5.8               | 0.2               | +1.07                                | +2.66                                | +1.58                                | -8.20                                  | -48.55                                    |
| 2012/12/03 13:50 | 2012/12/17 14:20 | 10.223    | 8    | 6.88 | 4.00 | 125.7             | 46.2              | 59.2              | 85.5              | 125.6             | 114.5             | 5.9               | 0.6               | +1.28                                | +4.21                                | +1.46                                | -8.12                                  | -46.81                                    |
| 2012/12/17 14:20 | 2012/12/27 14:20 | 4.500     | 6    | 7.00 | 4.14 | 141.6             | 31.7              | 57.7              | 89.8              | 130.9             | 119.9             | 5.3               | 0.4               |                                      |                                      |                                      |                                        |                                           |
| 2012/12/27 14:20 | 2013/01/15 14:10 | 3.479     | 6    | 6.97 | 4.16 | 146.5             | 29.3              | 58.1              | 95.3              | 138.0             | 127.0             | 5.8               | 0.8               |                                      |                                      |                                      |                                        |                                           |
| 2013/01/15 14:10 | 2013/01/28 14:40 | 4.190     | 4.5  | 6.99 | 4.11 | 143.7             | 28.8              | 58.8              | 89.3              | 130.3             | 118.9             | 5.3               | 0.5               | +0.60                                | +5.81                                | +1.33                                | -8.48                                  | -48.77                                    |
| 2013/01/28 14:40 | 2013/02/12 14:20 | 4.580     | 5.5  | 6.96 | 3.96 | 133.8             | 28.5              | 57.6              | 87.5              | 124.4             | 114.8             | 5.2               | 0.5               | +0.44                                | +6.95                                | +1.62                                | -8.39                                  | -49.22                                    |
| 2013/02/12 14:20 | 2013/02/25 14:30 | 3.683     | 5    | 6.98 | 4.12 | 142.3             | 27.6              | 58.2              | 91.3              | 130.6             | 120.8             | 5.2               | 0.8               |                                      |                                      |                                      |                                        |                                           |
| 2013/02/25 14:30 | 2013/03/11 14:00 | 3.614     | 6.5  | 7.02 | 4.12 | 139.9             | 24.4              | 57.0              | 88.2              | 128.8             | 120.4             | 5.3               | 0.5               | +1.27                                | +5.52                                | +1.71                                | -7.89                                  | -49.62                                    |
| 2013/03/11 14:00 | 2013/03/25 14:00 | 4.040     | 8.5  | 7.06 | 4.27 | 143.1             | 20.4              | 58.3              | 90.9              | 133.0             | 124.3             | 5.9               | 0.6               |                                      |                                      |                                      |                                        |                                           |
| 2013/03/25 14:00 | 2013/04/09 14:30 | 3.157     | 10.5 | 7.02 | 4.45 | 152.7             | 21.8              | 57.6              | 92.8              | 141.1             | 131.5             | 6.1               | 0.5               | -1.16                                | +3.96                                | +1.32                                | -8.21                                  | -50.77                                    |
| 2013/04/09 14:30 | 2013/04/22 13:50 | 2.522     | 10.5 | 7.09 | 4.59 | 165.6             | 23.7              | 60.5              | 98.7              | 149.4             | 138.0             | 6.2               | 0.8               |                                      |                                      |                                      |                                        |                                           |
| 2013/04/22 13:50 | 2013/05/07 14:10 | 3.753     | 11.5 | 7.04 | 4.26 | 143.0             | 13.6              | 56.6              | 93.9              | 134.8             | 125.4             | 6.2               | 0.7               | -0.46                                | +6.92                                | +1.69                                | -7.90                                  | -49.30                                    |
| 2013/05/07 14:10 | 2013/05/20 14:20 | 4.500     | 15   | 7.01 | 4.43 | 147.1             | 27.3              | 55.3              | 93.5              | 146.8             | 134.5             | 7.1               | 1.3               |                                      |                                      |                                      |                                        |                                           |
| 2013/05/20 14:20 | 2013/06/03 14:10 | 4.580     | 15.5 | 6.81 | 4.19 | 136.7             | 21.6              | 57.0              | 92.0              | 134.6             | 124.0             | 6.8               | 1.1               |                                      |                                      |                                      |                                        |                                           |
| 2013/06/03 14:10 | 2013/06/17 14:10 | 2.742     | 19.5 | 6.97 | 4.56 | 156.2             | 19.0              | 57.8              | 100.7             | 148.4             | 136.2             | 7.5               | 0.6               | -0.54                                | +1.33                                | +1.09                                | -7.74                                  | -48.86                                    |
| 2013/06/17 14:10 | 2013/07/01 14:10 | 4.580     | 17   | 6.91 | 4.24 | 132.8             |                   | 56.6              | 92.1              | 141.3             | 128.5             | 7.0               | 1.5               |                                      |                                      |                                      |                                        |                                           |
| 2013/07/01 14:10 | 2013/07/16 14:10 | 5.524     | 19   | 6.87 | 4.01 | 126.5             | 21.7              | 56.9              | 89.8              | 130.3             | 119.7             | 7.3               | 1.4               | -0.95                                | +3.84                                | +1.39                                | -8.19                                  | -50.56                                    |
| 2013/07/16 14:10 | 2013/07/29 13:30 | 48.939    | 19.5 | 6.44 | 3.35 | 99.1              | 58.4              | 35.9              | 64.4              | 111.6             | 98.6              | 9.5               | 1.1               |                                      |                                      |                                      |                                        |                                           |
| 2013/07/29 13:30 | 2013/08/12 13:50 | 7.125     | 20.5 | 6.90 | 3.69 | 112.8             | 22.6              | 58.0              | 85.0              | 114.3             | 107.2             | 6.7               | 0.5               |                                      |                                      |                                      |                                        |                                           |
| 2013/08/12 13:50 | 2013/08/26 14:00 | 3.220     | 20   | 6.83 | 4.22 | 134.9             | 30.1              | 57.7              | 96.3              | 137.8             | 127.1             | 7.6               | 1.4               | -0.41                                | +1.62                                | +0.67                                | -7.96                                  | -48.99                                    |
| 2013/08/26 14:00 | 2013/09/09 13:30 | 8.394     | 18.5 | 6.89 | 3.72 | 116.9             | 27.7              | 56.1              | 87.6              | 119.7             | 111.0             | 6.9               | 1.3               |                                      |                                      |                                      |                                        |                                           |
| 2013/09/09 13:30 | 2013/09/24 14:00 | 13.279    | 18.5 | 6.96 | 3.86 | 121.8             | 21.2              | 58.3              | 91.0              | 125.1             | 116.6             | 7.0               | 1.6               | +0.29                                | +4.78                                | +1.43                                | -8.40                                  | -50.63                                    |
| 2013/09/24 14:00 | 2013/10/07 14:00 | 8.394     | 18   | 7.22 | 4.25 | 145.0             | 19.8              | 59.3              | 100.1             | 139.8             | 129.2             | 7.4               | 1.5               |                                      |                                      |                                      |                                        |                                           |
| 2013/10/07 14:00 | 2013/10/21 14:00 | 20.291    | 16   | 7.02 | 3.91 | 126.5             | 33.0              | 55.9              | 89.3              | 128.6             | 118.6             | 6.8               | 1.4               | +1.04                                | +2.30                                | +0.99                                | -7.95                                  | -49.82                                    |
| 2013/10/21 14:00 | 2013/11/05 14:00 | 14.849    | 13.5 | 6.98 | 4.01 | 136.4             | 21.9              | 59.2              | 93.9              | 133.0             | 123.4             | 6.3               | 2.8               |                                      |                                      |                                      |                                        |                                           |
| 2013/11/05 14:00 | 2013/11/18 14:10 | 9.019     | 11.5 | 6.96 | 4.21 | 154.6             | 22.0              | 59.9              | 96.9              | 138.1             | 128.4             | 6.1               | 2.7               | -0.08                                | +4.15                                | +1.30                                | -8.16                                  | -49.85                                    |
| 2013/11/18 14:10 | 2013/12/02 14:30 | 8.891     | 9.5  | 6.95 | 4.27 | 164.5             | 21.6              | 60.1              | 98.4              | 143.7             | 134.0             | 6.0               | 3.4               |                                      |                                      |                                      |                                        |                                           |
| 2013/12/02 14:30 | 2013/12/16 13:50 | 13.119    | 7.5  | 6.92 | 4.35 | 160.8             | 29.4              | 66.1              | 94.5              | 145.9             | 135.5             | 5.8               | 3.2               | -0.56                                | +2.78                                | +1.39                                | -7.74                                  | -48.72                                    |
| 2013/12/16 13:50 | 2014/01/06 13:50 | 10.223    | 6    | 6.89 | 4.26 | 165.3             | 22.8              | 62.0              | 96.4              | 145.8             | 135.1             | 5.4               | 3.4               |                                      |                                      |                                      |                                        |                                           |
| 2014/01/06 13:50 | 2014/01/20 14:20 | 9.409     | 5    | 6.87 | 4.34 | 172.2             | 22.4              | 61.3              | 98.6              | 150.0             | 139.3             | 5.4               | 3.9               | -1.45                                | +3.43                                | +1.91                                | -8.04                                  | -50.20                                    |
| 2014/01/20 14:20 | 2014/02/03 13:20 | 10.937    | 7    | 6.88 | 4.49 | 171.0             | 25.9              | 60.6              | 99.4              | 156.0             | 144.6             | 5.7               | 3.7               |                                      |                                      |                                      |                                        |                                           |
| 2014/02/03 13:20 | 2014/02/17 13:40 | 12.628    | 5.5  | 6.96 | 4.34 | 170.2             | 29.2              | 60.4              | 96.8              | 149.0             | 139.2             | 5.6               | 3.6               | -1.12                                | +2.96                                | +1.29                                | -7.89                                  | -49.12                                    |
| 2014/02/17 13:40 | 2014/03/03 13:10 | 13.119    | 8    | 6.96 | 4.35 | 158.6             | 27.0              | 57.5              | 93.2              | 138.3             | 130.4             | 5.4               | 1.9               |                                      |                                      |                                      |                                        |                                           |
| 2014/03/03 13:10 | 2014/03/17 14:20 | 15.583    | 7.5  | 6.98 | 4.13 | 144.1             | 27.4              | 56.0              | 88.9              | 130.2             | 122.9             | 5.4               | 1.1               | +4.96                                | +3.85                                | +1.58                                | -8.72                                  | -50.98                                    |
| 2014/03/17 14:20 | 2014/03/26 13:40 | 19.194    | 9    | 6.95 | 4.10 | 141.6             | 25.0              | 56.2              | 88.9              | 132.3             | 124.0             | 5.7               | 0.8               |                                      |                                      |                                      |                                        |                                           |
| 2014/03/26 13:40 | 2014/04/15 14:40 | 11.685    | 11   | 6.98 | 4.15 | 144.4             | 21.3              | 59.2              | 93.3              | 132.0             | 125.2             | 5.8               | 2.5               | +0.42                                | +3.64                                | +1.85                                | -8.54                                  | -50.15                                    |
| 2014/04/15 14:40 | 2014/04/30 14:00 | 36.668    | 11.5 | 6.94 | 3.98 | 129.2             | 36.2              | 49.1              | 78.7              | 124.6             | 114.2             | 6.5               | 0.8               |                                      |                                      |                                      |                                        |                                           |
| 2014/04/30 14:00 | 2014/05/15 13:53 | 12.468    | 13   | 7.04 | 4.31 | 146.3             | 25.1              | 54.6              | 92.2              | 137.6             | 126.0             | 6.3               | 4.2               | +1.10                                | +3.87                                | +1.18                                | -8.23                                  | -47.97                                    |
| 2014/05/15 13:53 | 2014/05/30 13:41 | 12.791    | 15.5 | 6.99 | 4.21 | 139.1             | 26.1              | 54.1              | 88.2              | 134.7             | 123.6             | 6.4               | 2.0               |                                      |                                      |                                      |                                        |                                           |
| 2014/05/30 13:41 | 2014/06/16 13:50 | 9.675     | 16.5 | 7.05 | 4.57 | 157.2             | 21.0              | 55.7              | 97.0              | 145.3             | 133.1             | 7.7               | 2.1               | -0.77                                | +1.13                                | +0.92                                | -8.92                                  | -50.70                                    |
| 2014/06/16 13:50 | 2014/06/30 15:49 |           |      |      |      |                   |                   |                   |                   |                   |                   |                   |                   |                                      |                                      |                                      |                                        |                                           |

IJ2 stream

| start            | end              | flow rate | temp | pH   | EC   | SO4     | NO3     | Cl      | Na      | Ca      | Mg      | K       | NH4     | $\delta^{15}\text{N}(\text{NO}_3^-)$ | $\delta^{18}\text{O}(\text{NO}_3^-)$ | $\Delta^{17}\text{O}(\text{NO}_3^-)$ | $\delta^2\text{H}(\text{H}_2\text{O})$ | $\delta^{18}\text{O}(\text{H}_2\text{O})$ |
|------------------|------------------|-----------|------|------|------|---------|---------|---------|---------|---------|---------|---------|---------|--------------------------------------|--------------------------------------|--------------------------------------|----------------------------------------|-------------------------------------------|
|                  |                  | L/min     | °C   |      | mS/m | μmole/L | /10 <sup>3</sup>                     | /10 <sup>3</sup>                     | /10 <sup>3</sup>                     | /10 <sup>3</sup>                       | /10 <sup>3</sup>                          |
| 2011/12/26 14:10 | 2012/01/10 14:00 | —         | 7.0  | 6.97 | 3.78 | 110     | 22.2    | 58.5    | 101.3   | 92.2    | 97      | 4.53    | 0.47    |                                      |                                      |                                      |                                        |                                           |
| 2012/01/10 14:00 | 2012/01/23 13:40 | —         | 7.5  | 7.00 | 3.87 | 114.4   | 21.6    | 59.8    | 104.2   | 93.5    | 103.7   | 4.59    | 0       |                                      |                                      |                                      |                                        |                                           |
| 2012/01/23 13:40 | 2012/02/06 13:50 | —         | 5.5  | 6.82 | 3.87 | 116.5   | 19.8    | 60.3    | 100.8   | 95.8    | 105.7   | 4.57    | 1.04    |                                      |                                      |                                      |                                        |                                           |
| 2012/02/06 13:50 | 2012/02/20 13:20 | —         | 5.5  | 6.92 | 3.68 | 110.1   | 21.8    | 58      | 99.7    | 90.4    | 102.1   | 4.23    | 1.97    |                                      |                                      |                                      |                                        |                                           |
| 2012/02/20 13:20 | 2012/03/05 14:00 | —         | 8.0  | 6.64 | 3.09 | 81.3    | 53      | 47.6    | 73.2    | 74      | 91.1    | 5.69    | 0.74    | -1.07                                | +2.58                                | +0.85                                | -8.87                                  | -51.35                                    |
| 2012/03/05 14:00 | 2012/03/19 14:10 | —         | 8.0  | 6.87 | 3.39 | 101.1   | 22.5    | 58.6    | 90.2    | 80.5    | 100.9   | 4.88    | 0.8     | +2.06                                | +4.34                                | +1.48                                | -8.51                                  | -50.19                                    |
| 2012/03/19 14:10 | 2012/04/03 13:50 | —         | 9.0  | 6.86 | 3.29 | 97.1    | 21.6    | 63      | 88.2    | 78.7    | 97.5    | 6.11    | 1.02    |                                      |                                      |                                      |                                        |                                           |
| 2012/04/03 13:50 | 2012/04/16 13:30 | —         | 11.0 | 6.99 | 3.4  | 96.9    | 16.2    | 62.7    | 93.5    | 81.4    | 102.6   | 5.52    | 1.37    |                                      |                                      |                                      |                                        |                                           |
| 2012/04/16 13:30 | 2012/05/01 13:40 | —         | 13.0 | 6.99 | 3.49 | 99.2    | 15.9    | 62.5    | 94.8    | 84.6    | 105.7   | 5.95    | 1.16    | +0.43                                | +4.41                                | +0.82                                | -8.32                                  | -48.60                                    |
| 2012/05/01 13:40 | 2012/05/14 13:40 | —         | 13.0 | 6.91 | 3.75 | 110.5   | 14.4    | 65.9    | 104.4   | 94.5    | 117.3   | 6.64    | 1.38    | +2.27                                | +3.13                                | +1.90                                | -8.42                                  | -49.13                                    |
| 2012/05/14 13:40 | 2012/05/28 13:40 | —         | 14.5 | 7.02 | 3.98 | 105.6   | 18.9    | 58.7    | 104.3   | 100.1   | 122.8   | 6.42    | 0       |                                      |                                      |                                      |                                        |                                           |
| 2012/05/28 13:40 | 2012/06/11 13:30 | —         | 16.0 | 6.87 | 4.23 | 110.3   | 33.8    | 60.5    | 108.9   | 107.3   | 132.1   | 6.94    | 0.69    |                                      |                                      |                                      |                                        |                                           |
| 2012/06/11 13:30 | 2012/06/25 14:10 | —         | 16.0 | 6.85 | 3.26 | 89.7    | 15.4    | 56.9    | 88.5    | 76.1    | 95.7    | 6.28    | 0.62    | +1.01                                | +4.53                                | +2.02                                | -8.47                                  | -50.53                                    |
| 2012/06/25 14:10 | 2012/07/09 14:00 | —         | 17.0 | 6.84 | 3.21 | 84.9    | 14.9    | 56      | 88.2    | 77.3    | 95.4    | 6.58    | 0.66    |                                      |                                      |                                      |                                        |                                           |
| 2012/07/09 14:00 | 2012/07/30 13:50 | —         | 20.0 | 6.88 | 3.44 | 90.9    | 15.7    | 60.7    | 97.8    | 83.3    | 102.5   | 7.19    | 0.23    |                                      |                                      |                                      |                                        |                                           |
| 2012/07/30 13:50 | 2012/08/13 14:10 | —         | 20.5 | 7.04 | 4.11 | 96.9    | 33.9    | 62.6    | 105.6   | 105.4   | 127.8   | 7.9     | 0       | -0.15                                | +2.27                                | +1.48                                | -8.41                                  | -50.32                                    |
| 2012/08/13 14:10 | 2012/08/27 13:40 | —         | 20.5 | 7.00 | 3.65 | 92      | 22.2    | 58.1    | 101.3   | 91.3    | 111.8   | 7.41    | 0.8     | +1.28                                | +1.86                                | +1.23                                | -8.35                                  | -51.23                                    |
| 2012/08/27 13:40 | 2012/09/10 14:10 | —         | 20.0 | 7.04 | 4.1  | 95.8    | 39.1    | 58.2    | 105     | 107.2   | 129.6   | 7.87    | 0.66    |                                      |                                      |                                      |                                        |                                           |
| 2012/09/10 14:10 | 2012/09/24 14:10 | —         | 18.0 | 6.85 | 3.46 | 85.6    | 25.3    | 56.2    | 94      | 83.2    | 101.9   | 7       | 0.87    |                                      |                                      |                                      |                                        |                                           |
| 2012/09/24 14:10 | 2012/10/09 14:10 | —         | 17.0 | 6.99 | 3.69 | 98      | 24.3    | 59.4    | 99.5    | 91      | 112.4   | 6.62    | 0.92    | +3.28                                | +1.23                                | +0.90                                | -8.05                                  | -48.85                                    |
| 2012/10/09 14:10 | 2012/10/22 14:10 | —         | 15.0 | 7.03 | 3.83 | 100.4   | 25.8    | 59.6    | 101.8   | 95.6    | 117.8   | 6.3     | 0.84    | -0.07                                | +2.51                                | +0.88                                | -7.91                                  | -48.54                                    |
| 2012/10/22 14:10 | 2012/11/05 14:50 | —         | 13.5 | 6.99 | 3.87 | 109.5   | 28.6    | 62      | 103     | 97.7    | 120.4   | 6.1     | 1.35    |                                      |                                      |                                      |                                        |                                           |
| 2012/11/05 14:50 | 2012/11/19 14:00 | —         | 11.5 | 6.85 | 3.72 | 100.8   | 40.9    | 59.8    | 98.9    | 91.6    | 112.5   | 5.51    | 0.48    |                                      |                                      |                                      |                                        |                                           |
| 2012/11/19 14:00 | 2012/12/03 13:50 | —         | 9.5  | 6.88 | 3.72 | 109.8   | 25.5    | 59.8    | 103.1   | 90.3    | 112.2   | 5.37    | 0.8     | +0.36                                | +2.77                                | +1.18                                | -7.84                                  | -47.12                                    |
| 2012/12/03 13:50 | 2012/12/17 14:20 | —         | 9.0  | 6.75 | 3.31 | 91      | 32.9    | 60.4    | 92.3    | 78      | 97.5    | 5.03    | 0.5     | +0.22                                | +4.84                                | +0.83                                | -7.84                                  | -45.57                                    |
| 2012/12/17 14:20 | 2012/12/27 14:20 | —         | 7.0  | 6.92 | 3.5  | 106.3   | 21.7    | 60.9    | 98.3    | 83.2    | 104.1   | 4.59    | 0.38    |                                      |                                      |                                      |                                        |                                           |
| 2012/12/27 14:20 | 2013/01/15 14:10 | —         | 6.5  | 6.95 | 3.56 | 109.3   | 20.5    | 61.4    | 100.9   | 85.9    | 107     | 4.6     | 0.77    |                                      |                                      |                                      |                                        |                                           |
| 2013/01/15 14:10 | 2013/01/28 14:40 | —         | 5.0  | 6.89 | 3.52 | 107.2   | 20.4    | 62.1    | 97.4    | 84.1    | 104.5   | 4.31    | 0.38    | +0.89                                | +3.27                                | +1.67                                | -8.23                                  | -47.58                                    |
| 2013/01/28 14:40 | 2013/02/12 14:20 | —         | 6.0  | 6.91 | 3.41 | 104.9   | 17.9    | 60.7    | 97.7    | 81.6    | 103.1   | 4.39    | 0.58    | +1.21                                | +5.19                                | +0.95                                | -8.10                                  | -47.77                                    |
| 2013/02/12 14:20 | 2013/02/25 14:30 | —         | 5.0  | 6.93 | 3.49 | 108     | 18      | 61.5    | 99.8    | 84.4    | 106.6   | 4.34    | 0.8     |                                      |                                      |                                      |                                        |                                           |
| 2013/02/25 14:30 | 2013/03/11 14:00 | —         | 7.0  | 6.93 | 3.6  | 108.7   | 11.1    | 59.8    | 99.7    | 85.5    | 109.1   | 4.41    | 0.94    | +0.41                                | +7.14                                | +1.25                                | -7.69                                  | -50.36                                    |
| 2013/03/11 14:00 | 2013/03/25 14:00 | —         | 8.5  | 6.98 | 3.72 | 110.8   | 13.2    | 61.1    | 102.3   | 90      | 115     | 4.81    | 1.03    |                                      |                                      |                                      |                                        |                                           |
| 2013/03/25 14:00 | 2013/04/09 14:30 | —         | 10.0 | 6.99 | 3.89 | 113.4   | 15.7    | 62.8    | 105.7   | 96.5    | 121.6   | 5.27    | 1.14    | -0.25                                | +3.23                                | +0.83                                | -8.12                                  | -51.64                                    |
| 2013/04/09 14:30 | 2013/04/22 13:50 | —         | 10.0 | 7.00 | 4.01 | 119.8   | 16.3    | 65      | 108.1   | 98.6    | 124.5   | 5.21    | 0.26    |                                      |                                      |                                      |                                        |                                           |
| 2013/04/22 13:50 | 2013/05/07 14:10 | —         | 11.0 | 7.02 | 3.72 | 111.5   | 11.4    | 61.4    | 104.7   | 92.4    | 116.9   | 5.49    | 1.62    | +3.28                                | +2.96                                | +0.63                                | -7.68                                  | -50.11                                    |
| 2013/05/07 14:10 | 2013/05/20 14:20 | —         | 13.5 | 7.07 | 3.89 | 107.4   | 22.7    | 59.7    | 105.8   | 100.4   | 124.7   | 5.99    | 1.12    |                                      |                                      |                                      |                                        |                                           |
| 2013/05/20 14:20 | 2013/06/03 14:10 | —         | 15.0 | 6.92 | 3.61 | 105.2   | 14.3    | 60      | 103.1   | 90.4    | 113.2   | 6.04    | 1.49    |                                      |                                      |                                      |                                        |                                           |
| 2013/06/03 14:10 | 2013/06/17 14:10 | —         | 18.5 | 6.98 | 4.09 | 113.3   | 14.8    | 61.3    | 114     | 106.9   | 132.6   | 6.6     | 1.78    | -0.00                                | +0.33                                | +0.64                                | -7.31                                  | -49.19                                    |
| 2013/06/17 14:10 | 2013/07/01 14:10 | —         | 16.5 | 6.86 | 3.63 | 100.9   | 14.5    | 58.8    | 103     | 91.3    | 114.3   | 6.23    | 2.04    |                                      |                                      |                                      |                                        |                                           |
| 2013/07/01 14:10 | 2013/07/16 14:10 | —         | 19.0 | 6.85 | 3.59 | 96.4    | 18.1    | 60.2    | 102.3   | 90.8    | 113.3   | 6.84    | 1.98    | +0.09                                | +1.64                                | +0.62                                | -7.46                                  | -50.67                                    |
| 2013/07/16 14:10 | 2013/07/29 13:30 | —         | 19.5 | 6.46 | 2.98 | 68.8    | 60.9    | 39.5    | 74.8    | 78      | 93.7    | 8.15    | 1.85    |                                      |                                      |                                      |                                        |                                           |
| 2013/07/29 13:30 | 2013/08/12 13:50 | —         | 20.0 | 6.83 | 3.34 | 88.4    | 14.3    | 60.7    | 99.1    | 81.3    | 102.3   | 6.78    | 1.37    |                                      |                                      |                                      |                                        |                                           |
| 2013/08/12 13:50 | 2013/08/26 14:00 | —         | 21.0 | 6.80 | 3.81 | 97.1    | 30.4    | 62.6    | 108.6   | 99.3    | 122.2   | 7.27    | 1.79    | +0.46                                | -0.21                                | +0.71                                | -7.36                                  | -49.38                                    |
| 2013/08/26 14:00 | 2013/09/09 13:30 | —         | 19.0 | 6.80 | 3.23 | 90.9    | 17      | 59      | 95.9    | 79.4    | 99.5    | 6.44    | 1.89    |                                      |                                      |                                      |                                        |                                           |
| 2013/09/09 13:30 | 2013/09/24 14:00 | —         | 18.5 | 7.06 | 3.43 | 96.4    | 14.9    | 62.5    | 104     | 86.1    | 107.5   | 6.65    | 2.17    | +1.23                                | +1.68                                | +1.01                                | -8.13                                  | -51.07                                    |
| 2013/09/24 14:00 | 2013/10/07 14:00 | —         | 18.0 | 6.92 | 3.84 | 105.1   | 17.7    | 64.6    | 112.7   | 99.7    | 124     | 6.81    | 0.44    |                                      |                                      |                                      |                                        |                                           |
| 2013/10/07 14:00 | 2013/10/21 14:00 | —         | 16.0 | 6.88 | 3.31 | 93      | 21.6    | 58.2    | 96.2    | 80.7    | 100.4   | 6.43    | 1.74    | +0.01                                | +2.38                                | +0.43                                | -7.57                                  | -49.77                                    |
| 2013/10/21 14:00 | 2013/11/05 14:00 | —         | 14.0 | 6.95 | 3.52 | 104.6   | 14.9    | 62.9    | 104.7   | 89.9    | 112.1   | 5.64    | 2.8     |                                      |                                      |                                      |                                        |                                           |
| 2013/11/05 14:00 | 2013/11/18 14:10 | —         | 12.0 | 6.95 | 3.62 | 109.8   | 15.9    | 62      | 106.3   | 93.7    | 117.8   | 5.49    | 2.99    | +0.49                                | +3.61                                | +1.45                                | -7.87                                  | -50.19                                    |
| 2013/11/18 14:10 | 2013/12/02 14:30 | —         | 10.0 | 6.93 | 3.66 | 116     | 15.9    | 62.5    | 106.9   | 95.3    | 119.7   | 5.24    | 3.44    |                                      |                                      |                                      |                                        |                                           |
| 2013/12/02 14:30 | 2013/12/16 13:50 | —         | 8.0  | 6.86 | 3.63 | 110.2   | 23.2    | 67.9    | 103.4   | 92.9    | 116.3   | 6.28    | 3.43    | -0.18                                | +1.14                                | +1.02                                | -7.57                                  | -49.25                                    |
| 2013/12/16 13:50 | 2014/01/06 13:50 | —         | 6.5  | 6.80 | 3.64 | 120.6   | 13.6    | 65.6    | 106.5   | 95.3    | 120.2   | 4.68    | 3.71    |                                      |                                      |                                      |                                        |                                           |
| 2014/01/06 13:50 | 2014/01/20 14:20 | —         | 6.0  | 6.87 | 3.73 | 122.4   | 14.3    | 63.1    | 104.5   | 94.6    | 119.8   | 4.38    | 2.1     | -0.86                                | +2.43                                | +0.89                                | -7.72                                  | -50.59                                    |
| 2014/01/20 14:20 | 2014/02/03 13:20 | —         | 7.0  | 6.85 | 3.82 | 122.9   | 19      | 64.3    | 111.1   | 102.3   | 129.2   | 4.95    | 4.05    |                                      |                                      |                                      |                                        |                                           |
| 2014/02/03 13:20 | 2014/02/17 13:40 | —         | 6.0  | 6.88 | 3.56 | 120.5   | 21.8    | 62.7    | 105.9   | 93.3    | 117.9   | 4.78    | 4.34    | +0.48                                | +2.12                                | +0.55                                | -7.45                                  | -49.55                                    |
| 2014/02/17 13:40 | 2014/03/03 13:10 | —         | 8.5  | 6.92 | 3.7  | 117.3   | 17.7    | 59.8    | 103.4   | 88.8    | 116     | 4.47    | 1.8     |                                      |                                      |                                      |                                        |                                           |
| 2014/03/03 13:10 | 2014/03/17 14:20 | —         | 7.5  | 6.91 | 3.53 | 109.8   | 16.4    | 61.1    | 98.7    | 83.9    | 110     | 4.42    | 1.88    | +0.49                                | +5.03                                | +1.19                                | -8.74                                  | -51.31                                    |
| 2014/03/17 14:20 | 2014/03/26 13:40 | —         | 9.0  | 6.88 | 3.55 | 108.7   | 13.8    | 59.7    | 100.1   | 85.6    | 111.8   | 4.88    | 2.16    |                                      |                                      |                                      |                                        |                                           |
| 2014/03/26 13:40 | 2014/04/15 14:40 | —         | 10.5 | 6.96 | 3.67 | 111.4   | 11.6    | 67.4    | 105     | 89.5    | 116.6   | 5.06    | 2.13    | +0.39                                | +0.87                                | +0.78                                | -8.39                                  | -49.44                                    |
| 2014/04/15 14:40 | 2014/04/30 14:00 | —         | 11.5 | 6.83 | 3.4  | 92.1    | 28      | 53.5    | 91.3    | 81.2    | 102.8   | 5.61    | 1       |                                      |                                      |                                      |                                        |                                           |
| 2014/04/30 14:00 | 2014/05/15 13:53 | —         | 12.5 | 6.93 | 3.76 | 109.2   | 14.4    | 57.7    | 103.9   | 92.3    | 116.1   | 5.58    | 1.5     | +0.30                                | +2.03                                | +0.73                                | -8.43                                  | -47.20                                    |
| 2014/05/15 13:53 | 2014/05/30 13:41 | —         | 14.8 | 6.99 | 3.72 | 107     | 17.1    | 56.1    | 100.1   | 91.2    | 115     | 5.59    | 2.21    |                                      |                                      |                                      |                                        |                                           |
| 2014/05/30 13:41 | 2014/06/16 13:50 | —         | 16.5 | 7.12 | 4.02 | 112.2   | 15.5    | 58.4    | 107.8   | 98.4    | 124.8   | 6.59    | 2.33    | +0.35                                | -0.80                                | +0.54                                | -8.71                                  | -49.53                                    |
| 2014/06/16 13:50 | 2014/06/30 15:49 | —         | 17.0 | 7.08 | 4.32 | 109.9   | 23.8    | 58.9    | 117.1   | 110.2   | 141.5   | 7.02    | 2.59    |                                      |                                      |                                      |                                        |                                           |
| 2014/06/30 15:49 | 2014/07/15 13:50 | —         | 18.5 | 7.00 | 3.28 | 89.3    | 14.5    | 69.9    | 94      | 75.2    | 96.5    | 6.82    | 1.39    | +0.20                                |                                      |                                      |                                        |                                           |

KJ stream

| start      | end        | Discharge at<br>the end time | pH   | EC    | SO <sub>4</sub> <sup>2-</sup> | NO <sub>3</sub> <sup>-</sup> | Cl <sup>-</sup> | NH <sub>4</sub> <sup>+</sup> | Na <sup>+</sup> | K <sup>+</sup> | Ca <sup>2+</sup> | Mg <sup>2+</sup> | δ <sup>2</sup> H(H <sub>2</sub> O) | δ <sup>18</sup> O(H <sub>2</sub> O) | δ <sup>15</sup> N(NO <sub>3</sub> <sup>-</sup> ) | δ <sup>18</sup> O(NO <sub>3</sub> <sup>-</sup> ) | Δ <sup>17</sup> O(NO <sub>3</sub> <sup>-</sup> ) |
|------------|------------|------------------------------|------|-------|-------------------------------|------------------------------|-----------------|------------------------------|-----------------|----------------|------------------|------------------|------------------------------------|-------------------------------------|--------------------------------------------------|--------------------------------------------------|--------------------------------------------------|
|            |            | L/min                        |      | μS/cm | μmole/L                       | μmole/L                      | μmole/L         | μmole/L                      | μmole/L         | μmole/L        | μmole/L          | μmole/L          | /10 <sup>3</sup>                   | /10 <sup>3</sup>                    | /10 <sup>3</sup>                                 | /10 <sup>3</sup>                                 | /10 <sup>3</sup>                                 |
| 2012/05/31 | 2012/06/29 | 48.23                        | 7.62 | 112.6 | 116.0                         | 46.1                         | 479.4           | 0.0                          | 387.2           | 24.0           | 350.5            | 220.5            |                                    |                                     |                                                  |                                                  |                                                  |
| 2012/06/29 | 2012/07/31 | 40.73                        | 7.49 | 109.4 | 100.9                         | 36.7                         | 420.2           | 0.8                          | 414.2           | 24.8           | 362.3            | 236.0            |                                    |                                     |                                                  |                                                  |                                                  |
| 2012/07/31 | 2012/08/31 | 26.74                        | 7.62 | 111.8 | 101.0                         | 33.0                         | 423.3           | 0.6                          | 392.9           | 25.1           | 346.0            | 233.6            |                                    |                                     |                                                  |                                                  |                                                  |
| 2012/08/31 | 2012/09/28 | 28.97                        | 7.65 | 113.0 | 101.9                         | 47.1                         | 423.1           | 1.9                          | 400.7           | 26.0           | 354.6            | 244.9            |                                    |                                     |                                                  |                                                  |                                                  |
| 2012/09/28 | 2012/10/31 | 26.74                        | 7.65 | 103.3 | 101.0                         | 44.0                         | 406.1           | 1.7                          | 393.6           | 26.9           | 350.9            | 240.4            |                                    |                                     |                                                  |                                                  |                                                  |
| 2012/10/31 | 2012/11/30 | 54.97                        | 7.57 | 107.8 | 100.5                         | 63.1                         | 374.5           | 0.5                          | 374.9           | 24.3           | 337.5            | 222.2            |                                    |                                     |                                                  |                                                  |                                                  |
| 2012/11/30 | 2012/12/26 | 92.71                        | 7.50 | 103.8 | 99.0                          | 62.7                         | 375.3           | 1.1                          | 391.5           | 22.7           | 344.1            | 221.0            | -48.16                             | -8.83                               | -2.98                                            | +0.09                                            | +1.04                                            |
| 2012/12/26 | 2013/01/31 | 69.60                        | 7.53 | 105.7 | 98.1                          | 60.0                         | 388.9           | 1.6                          | 376.3           | 22.0           | 334.9            | 209.0            |                                    |                                     |                                                  |                                                  |                                                  |
| 2013/01/31 | 2013/02/25 | 66.82                        | 7.60 | 107.9 | 97.9                          | 56.0                         | 398.8           | 1.5                          | 364.3           | 21.7           | 340.0            | 212.7            | -47.88                             | -9.30                               | -3.24                                            | +0.70                                            | +0.84                                            |
| 2013/02/25 | 2013/03/29 | 126.92                       | 7.47 | 102.8 | 94.7                          | 54.5                         | 400.9           | 1.1                          | 365.3           | 20.9           | 321.6            | 196.1            |                                    |                                     |                                                  |                                                  |                                                  |
| 2013/03/29 | 2013/04/30 | 78.08                        | 7.52 | 107.1 | 97.6                          | 47.5                         | 412.6           | 0.4                          | 375.9           | 20.8           | 340.0            | 209.1            | -47.68                             | -9.11                               | -3.18                                            | +0.83                                            | +1.44                                            |
| 2013/04/30 | 2013/05/31 | 75.22                        | 7.56 | 107.8 | 99.5                          | 66.9                         | 420.9           | 0.0                          | 382.8           | 23.0           | 339.6            | 214.0            |                                    |                                     |                                                  |                                                  |                                                  |
| 2013/05/31 | 2013/06/28 | 58.67                        | 7.51 | 108.7 | 100.8                         | 63.4                         | 426.8           | 3.5                          | 392.3           | 23.3           | 342.3            | 222.6            |                                    |                                     |                                                  |                                                  |                                                  |
| 2013/06/28 | 2013/07/30 | 95.71                        | 7.31 | 102.2 | 105.8                         | 50.3                         | 410.1           | 3.5                          | 375.9           | 22.2           | 327.5            | 200.0            | -48.56                             | -9.05                               | -1.75                                            | +1.13                                            | +1.52                                            |
| 2013/07/30 | 2013/08/30 | 123.71                       | 7.21 | 96.3  | 100.3                         | 57.7                         | 389.7           | 2.4                          | 349.1           | 25.4           | 302.7            | 183.6            | -48.20                             | -8.84                               | -1.99                                            | -0.94                                            | +0.90                                            |
| 2013/08/30 | 2013/09/30 | 83.86                        | 7.46 | 107.9 | 98.7                          | 42.7                         | 412.5           | 2.5                          | 388.5           | 23.3           | 344.3            | 214.9            |                                    |                                     |                                                  |                                                  |                                                  |
| 2013/09/30 | 2013/10/31 | 107.94                       | 7.50 | 106.3 | 98.7                          | 57.0                         | 385.5           | 1.4                          | 382.4           | 23.4           | 337.6            | 208.4            | -48.18                             | -8.91                               | -2.67                                            | -0.46                                            | +0.93                                            |
| 2013/10/31 | 2013/11/29 | 149.97                       | 7.41 | 94.0  | 91.7                          | 96.1                         | 333.8           | 1.1                          | 336.7           | 19.9           | 295.7            | 175.2            |                                    |                                     |                                                  |                                                  |                                                  |
| 2013/11/29 | 2013/12/25 | 205.92                       | 7.36 | 98.1  | 99.2                          | 84.8                         | 403.6           | 2.5                          | 367.2           | 20.6           | 310.3            | 182.2            | -48.06                             | -8.89                               | -2.87                                            | -0.06                                            | +1.74                                            |
| 2013/12/25 | 2014/01/31 | 170.44                       | 7.38 | 104.4 | 104.3                         | 76.1                         | 472.0           | 3.2                          | 389.1           | 21.0           | 340.8            | 201.9            |                                    |                                     |                                                  |                                                  |                                                  |
| 2014/01/31 | 2014/02/27 | 111.05                       | 7.42 | 109.4 | 98.6                          | 61.6                         | 450.5           | 1.6                          | 384.3           | 21.9           | 353.5            | 211.6            |                                    |                                     |                                                  |                                                  |                                                  |
| 2014/02/27 | 2014/03/31 | 149.97                       | 7.36 | 103.3 | 96.1                          | 51.3                         | 424.8           | 0.9                          | 365.3           | 20.2           | 325.4            | 190.7            |                                    |                                     |                                                  |                                                  |                                                  |
| 2014/03/31 | 2014/04/30 | 101.78                       | 7.43 | 110.7 | 101.7                         | 45.4                         | 462.6           | 3.4                          | 390.6           | 22.2           | 351.8            | 213.1            | -47.02                             | -9.05                               | -1.95                                            | +2.17                                            | +2.01                                            |
| 2014/04/30 | 2014/05/30 | 58.67                        | 7.46 | 111.4 | 99.6                          | 40.9                         | 452.3           | 5.4                          | 395.4           | 23.4           | 352.7            | 217.8            | -47.48                             | -8.87                               | -1.77                                            | +1.94                                            | +1.82                                            |
| 2014/05/30 | 2014/06/30 | 166.99                       | 7.32 | 89.0  | 87.8                          | 66.4                         | 336.8           | 0.5                          | 327.8           | 20.8           | 283.6            | 165.8            | -59.12                             | -9.95                               | -1.33                                            | +2.07                                            | +1.52                                            |
| 2014/06/30 | 2014/07/31 | 72.40                        | 7.46 | 108.6 | 99.0                          | 41.7                         | 436.5           | 5.6                          | 384.9           | 22.4           | 335.0            | 214.3            | -48.15                             | -9.32                               | +1.35                                            | +2.15                                            | +1.62                                            |
| 2014/07/31 | 2014/08/29 | 80.95                        | 7.54 | 110.5 | 102.6                         | 40.6                         | 440.5           | 3.7                          | 397.5           | 24.3           | 357.1            | 232.6            | -47.96                             | -9.23                               | +1.55                                            | +1.07                                            | +1.07                                            |
| 2014/08/29 | 2014/09/30 | 53.39                        | 7.53 | 112.2 | 99.2                          | 36.7                         | 431.3           | 0.0                          | 392.5           | 24.7           | 350.7            | 234.1            |                                    |                                     |                                                  |                                                  |                                                  |
| 2014/09/30 | 2014/10/31 | 50.79                        | 7.58 | 111.6 | 101.2                         | 41.7                         | 417.9           | 1.2                          | 387.0           | 24.7           | 348.5            | 232.2            | -46.20                             | -8.70                               | -1.50                                            | -0.72                                            | +1.18                                            |
| 2014/10/31 | 2014/11/27 | 72.40                        | 7.61 | 107.7 | 94.8                          | 64.2                         | 375.9           | 1.3                          | 376.1           | 23.5           | 336.5            | 222.7            | -47.43                             | -8.93                               | -1.98                                            | -2.32                                            | +1.42                                            |
| 2014/11/27 | 2014/12/26 | 133.41                       | 7.47 | 100.6 | 92.7                          | 70.8                         | 366.5           | 2.1                          | 351.4           | 20.9           | 313.7            | 188.9            | -48.57                             | -9.53                               | -1.86                                            | -1.71                                            | +1.07                                            |
| 2014/12/26 | 2015/01/30 | 136.68                       | 7.42 | 104.4 | 103.2                         | 58.7                         | 451.2           | 1.4                          | 362.5           | 21.0           | 332.2            | 201.0            |                                    |                                     |                                                  |                                                  |                                                  |

## IJ\_deposition

|               | 2013                 | 2013                 | 2013                 | 2013                 | 2014                 | 2014                 | 2014                 | 2014                 | 2014-15 avg          | 2014-15 avg          | 2014-15 avg          | 2014-15 avg          |
|---------------|----------------------|----------------------|----------------------|----------------------|----------------------|----------------------|----------------------|----------------------|----------------------|----------------------|----------------------|----------------------|
|               | wet (nitrate)        | HNO <sub>3</sub> gas | particle (nitrate)   | total                | wet (nitrate)        | HNO <sub>3</sub> gas | particle             | total                | wet (nitrate)        | HNO <sub>3</sub> gas | particle (nitrate)   | total                |
|               | mmol m <sup>-2</sup> |
| Jan           | 2.77                 | 0.05                 | 0.01                 | 2.84                 | 3.29                 | 0.09                 | 0.01                 | 3.40                 | 3.03                 | 0.07                 | 0.01                 | 3.12                 |
| Feb           | 4.22                 | 0.04                 | 0.01                 | 4.27                 | 1.20                 | 0.12                 | 0.02                 | 1.34                 | 2.71                 | 0.08                 | 0.02                 | 2.81                 |
| Mar           | 3.60                 | 0.27                 | 0.08                 | 3.95                 | 4.53                 | 0.33                 | 0.05                 | 4.91                 | 4.07                 | 0.30                 | 0.07                 | 4.43                 |
| Apr           | 2.48                 | 0.43                 | 0.02                 | 2.93                 | 1.45                 | 0.42                 | 0.04                 | 1.92                 | 1.96                 | 0.43                 | 0.03                 | 2.42                 |
| May           | 2.50                 | 0.38                 | 0.03                 | 2.91                 | 3.64                 | 0.25                 | 0.02                 | 3.92                 | 3.07                 | 0.32                 | 0.03                 | 3.42                 |
| June          | 3.50                 | 0.26                 | 0.01                 | 3.77                 | 2.01                 | 0.26                 | 0.01                 | 2.28                 | 2.76                 | 0.26                 | 0.01                 | 3.02                 |
| July          | 7.06                 | 0.24                 | 0.00                 | 7.30                 | 7.50                 | 0.15                 | 0.00                 | 7.65                 | 7.28                 | 0.19                 | 0.00                 | 7.48                 |
| Aug           | 4.49                 | 0.20                 | 0.00                 | 4.69                 | 9.77                 | 0.07                 | 0.00                 | 9.85                 | 7.13                 | 0.13                 | 0.00                 | 7.27                 |
| Sept          | 2.29                 | 0.02                 | 0.00                 | 2.31                 | 1.83                 | --                   | --                   | 1.83                 | 2.06                 | 0.02                 | 0.00                 | 2.08                 |
| Oct           | 2.36                 | 0.01                 | 0.00                 | 2.37                 | 4.50                 | 0.02                 | 0.01                 | 4.53                 | 3.43                 | 0.01                 | 0.00                 | 3.45                 |
| Nov           | 2.84                 | 0.04                 | 0.01                 | 2.89                 | 1.71                 | --                   | --                   | 1.71                 | 2.28                 | 0.04                 | 0.01                 | 2.32                 |
| Dec           | 2.10                 | 0.03                 | 0.01                 | 2.13                 | 3.24                 | 0.01                 | 0.00                 | 3.25                 | 2.67                 | 0.02                 | 0.00                 | 2.69                 |
| <b>Annual</b> | 40.21                | 1.98                 | 0.17                 | 42.36                | 44.68                | 1.71                 | 0.18                 | 46.57                | 42.45                | 1.87                 | 0.18                 | 44.50                |
|               | 0.949                | 0.047                | 0.004                | 1.000                | 0.959                | 0.037                | 0.004                | 1.000                | 0.954                | 0.042                | 0.004                | 1.000                |

## KJ deposition

| start      | end        | Precipitation | H <sup>+</sup> | SO <sub>4</sub> <sup>2-</sup> | NO <sub>3</sub> <sup>-</sup> | Cl <sup>-</sup> | NH <sub>4</sub> <sup>+</sup> | Na <sup>+</sup> | K <sup>+</sup> | Ca <sup>2+</sup> | Mg <sup>2+</sup> |
|------------|------------|---------------|----------------|-------------------------------|------------------------------|-----------------|------------------------------|-----------------|----------------|------------------|------------------|
|            |            | mm            | molc/ha        | molc/ha                       | molc/ha                      | molc/ha         | molc/ha                      | molc/ha         | molc/ha        | molc/ha          | molc/ha          |
| 2012/05/31 | 2012/06/29 | 25.46         | 0.16           | 21.59                         | 26.85                        | 19.69           | 44.10                        | 16.03           | 15.12          | 3.82             | 3.29             |
| 2012/06/29 | 2012/07/31 | 229.18        | 22.45          | 54.85                         | 46.46                        | 9.85            | 84.69                        | 11.89           | 5.38           | 5.64             | 3.16             |
| 2012/07/31 | 2012/08/31 | 20.37         | 16.11          | 10.60                         | 17.88                        | 8.07            | 5.46                         | 7.21            | 1.40           | 3.33             | 3.00             |
| 2012/08/31 | 2012/09/28 | 144.83        | 34.19          | 28.57                         | 29.60                        | 18.27           | 9.77                         | 11.91           | 2.44           | 10.90            | 9.06             |
| 2012/09/28 | 2012/10/31 | 263.88        | 51.93          | 69.40                         | 46.60                        | 200.73          | 27.68                        | 169.51          | 5.55           | 20.62            | 44.78            |
| 2012/10/31 | 2012/11/30 | 245.74        | 36.26          | 147.05                        | 44.57                        | 570.23          | 14.96                        | 486.87          | 27.84          | 73.83            | 152.69           |
| 2012/11/30 | 2012/12/26 | 302.39        | 107.79         | 266.52                        | 51.54                        | 1323.98         | 50.86                        | 1182.57         | 32.62          | 87.33            | 284.36           |
| 2012/12/26 | 2013/01/31 | 282.98        | 132.05         | 230.97                        | 82.28                        | 669.41          | 84.96                        | 584.00          | 17.16          | 55.63            | 143.61           |
| 2013/01/31 | 2013/02/25 | 117.14        | 47.06          | 102.63                        | 35.40                        | 290.20          | 37.80                        | 248.20          | 8.16           | 34.69            | 64.02            |
| 2013/02/25 | 2013/03/29 | 100.27        | 10.24          | 118.86                        | 55.50                        | 195.53          | 59.66                        | 177.88          | 8.53           | 76.23            | 53.29            |
| 2013/03/29 | 2013/04/30 | 179.53        | 39.28          | 113.86                        | 54.79                        | 160.15          | 62.27                        | 141.99          | 8.84           | 50.60            | 44.08            |
| 2013/04/30 | 2013/05/31 | 57.93         | 0.79           | 45.86                         | 23.08                        | 70.78           | 36.24                        | 60.78           | 8.88           | 22.66            | 20.35            |
| 2013/05/31 | 2013/06/28 | 72.89         | 7.65           | 17.41                         | 16.76                        | 4.75            | 23.08                        | 2.77            | 2.06           | 6.74             | 3.93             |
| 2013/06/28 | 2013/07/30 | 334.23        | 53.96          | 102.46                        | 67.11                        | 40.48           | 98.28                        | 26.93           | 4.81           | 17.40            | 17.14            |
| 2013/07/30 | 2013/08/30 | 122.23        | 13.19          | 38.98                         | 23.89                        | 21.59           | 38.27                        | 16.18           | 2.44           | 8.13             | 7.34             |
| 2013/08/30 | 2013/09/30 | 55.39         | 2.81           | 10.48                         | 5.94                         | 23.81           | 11.39                        | 19.85           | 1.09           | 3.60             | 5.27             |
| 2013/09/30 | 2013/10/31 | 221.54        | 27.38          | 76.48                         | 29.01                        | 280.39          | 28.13                        | 243.18          | 10.74          | 28.23            | 60.63            |
| 2013/10/31 | 2013/11/29 | 327.86        | 87.84          | 171.18                        | 49.55                        | 685.20          | 37.50                        | 574.03          | 22.73          | 61.02            | 151.72           |
| 2013/11/29 | 2013/12/25 | 296.66        | 104.30         | 165.90                        | 57.72                        | 713.48          | 51.70                        | 605.40          | 16.26          | 49.03            | 144.75           |
| 2013/12/25 | 2014/01/31 | 103.77        | 46.14          | 99.18                         | 37.53                        | 278.11          | 43.28                        | 237.23          | 8.55           | 29.74            | 59.26            |
| 2014/01/31 | 2014/02/27 | 91.67         | 36.58          | 67.85                         | 24.66                        | 187.41          | 30.57                        | 162.63          | 5.79           | 20.39            | 40.67            |
| 2014/02/27 | 2014/03/31 | 95.49         | 29.78          | 46.19                         | 26.28                        | 131.87          | 20.94                        | 117.73          | 4.00           | 16.83            | 27.39            |
| 2014/03/31 | 2014/04/30 | 51.57         | 4.30           | 31.32                         | 19.52                        | 41.00           | 26.09                        | 37.20           | 5.19           | 11.72            | 9.92             |
| 2014/04/30 | 2014/05/30 | 87.22         | 0.90           | 53.50                         | 25.02                        | 115.41          | 44.80                        | 102.82          | 9.79           | 33.53            | 25.27            |
| 2014/05/30 | 2014/06/30 | 171.89        | 1.76           | 21.43                         | 21.91                        | 12.28           | 35.15                        | 11.51           | 3.19           | 19.24            | 4.39             |
| 2014/06/30 | 2014/07/31 | 310.03        | 34.31          | 54.58                         | 41.03                        | 24.76           | 56.13                        | 16.99           | 4.64           | 15.91            | 4.94             |
| 2014/07/31 | 2014/08/29 | 171.89        | 25.13          | 29.05                         | 29.42                        | 18.10           | 17.53                        | 15.75           | 3.96           | 16.26            | 11.86            |
| 2014/08/29 | 2014/09/30 | 77.67         | 22.35          | 16.43                         | 25.95                        | 21.32           | 2.78                         | 19.91           | 2.28           | 7.92             | 7.67             |
| 2014/09/30 | 2014/10/31 | 240.32        | 47.29          | 65.17                         | 42.90                        | 228.97          | 15.46                        | 196.35          | 6.38           | 26.53            | 50.73            |
| 2014/10/31 | 2014/11/27 | 226.00        | 60.13          | 108.41                        | 43.92                        | 444.52          | 26.36                        | 383.03          | 12.74          | 36.82            | 87.15            |
| 2014/11/27 | 2014/12/26 | 334.23        | 61.24          | 171.98                        | 37.36                        | 893.59          | 30.24                        | 760.35          | 31.70          | 60.31            | 184.41           |
| 2014/12/26 | 2015/01/30 | 184.62        | 97.79          | 183.61                        | 75.38                        | 552.31          | 70.99                        | 433.18          | 12.53          | 35.51            | 102.43           |

KJ\_soil

| end        |       | $\delta^2\text{H}(\text{H}_2\text{O})$ | $\delta^{18}\text{O}(\text{H}_2\text{O})$ | $\text{NO}_3^-$ | $\delta^{15}\text{N}(\text{NO}_3^-)$ | $\delta^{18}\text{O}(\text{NO}_3^-)$ | $\Delta^{17}\text{O}(\text{NO}_3^-)$ |
|------------|-------|----------------------------------------|-------------------------------------------|-----------------|--------------------------------------|--------------------------------------|--------------------------------------|
|            |       | /10 <sup>3</sup>                       | /10 <sup>3</sup>                          | μmol/L          | /10 <sup>3</sup>                     | /10 <sup>3</sup>                     | /10 <sup>3</sup>                     |
| 2012/12/26 | SMS20 | - 30.8                                 | - 6.65                                    | 141.6           | - 0.76                               | + 6.30                               | + 1.74                               |
| 2013/4/30  | SMS20 | - 48.1                                 | - 8.70                                    | 100.1           | - 3.13                               | + 1.24                               | + 1.75                               |
| 2013/7/30  | SMS20 | - 43.8                                 | - 7.01                                    | 185.6           | - 1.15                               | + 1.37                               | + 0.33                               |
| 2013/9/2   | SMS20 | - 53.3                                 | - 8.31                                    | 372.4           | - 1.91                               | - 0.02                               | + 0.40                               |
| 2013/10/31 | SMS20 | - 60.9                                 | - 9.66                                    | 100.3           | - 0.56                               | + 0.94                               | + 0.38                               |
| 2013/12/25 | SMS20 | - 44.1                                 | - 9.75                                    | 47.9            | - 2.48                               | + 11.05                              | + 5.70                               |
| 2014/4/30  | SMS20 | - 56.3                                 | - 8.00                                    | 97.6            | - 3.73                               | + 5.79                               | + 4.58                               |
| 2014/5/30  | SMS20 | - 54.0                                 | - 7.50                                    | 160.2           | - 3.31                               | + 0.80                               | + 2.21                               |
| 2014/6/30  | SMS20 | - 88.0                                 | - 11.70                                   | 156.0           | - 3.14                               | - 2.35                               | + 1.01                               |
| 2014/7/31  | SMS20 | - 70.2                                 | - 9.40                                    | 74.0            | - 2.42                               | - 4.22                               | + 0.77                               |
| 2014/8/29  | SMS20 | - 55.9                                 | - 7.50                                    | 317.4           | - 3.26                               | + 3.24                               | + 0.68                               |
| 2014/9/30  | SMS20 | - 47.5                                 | - 6.70                                    | 83.1            | + 1.24                               | + 2.82                               | + 0.71                               |
| 2014/10/31 | SMS20 | - 51.1                                 | - 8.58                                    | 6.5             | - 0.63                               | - 0.22                               | + 1.60                               |
| 2014/11/27 | SMS20 | - 44.8                                 | - 7.21                                    | 36.0            | - 3.55                               | - 0.68                               | + 0.69                               |
| 2014/12/26 | SMS20 | - 27.7                                 | - 6.57                                    | 39.4            | - 5.24                               | - 3.09                               | + 1.17                               |
| 2012/12/26 | SLS20 | - 50.3                                 | - 10.83                                   | 126.2           | - 8.22                               | - 2.60                               | + 1.49                               |
| 2013/4/30  | SLS20 | - 44.1                                 | - 8.26                                    | 126.0           | - 4.17                               | + 3.78                               | + 2.46                               |
| 2013/7/30  | SLS20 | - 56.3                                 | - 8.55                                    | 595.0           | - 2.82                               | - 1.91                               | + 0.63                               |
| 2013/9/2   | SLS20 | - 55.8                                 | - 8.49                                    | 1,623.7         | - 1.67                               | - 2.04                               | + 0.10                               |
| 2013/10/31 | SLS20 | - 64.0                                 | - 10.02                                   | 1,465.9         | - 1.25                               | - 1.36                               | + 0.16                               |
| 2013/12/25 | SLS20 | - 47.7                                 | - 10.07                                   | 81.7            | - 2.24                               | + 9.41                               | + 5.16                               |
| 2014/4/30  | SLS20 | - 72.2                                 | - 9.90                                    | 357.9           | - 0.72                               | + 0.45                               | + 2.40                               |
| 2014/5/30  | SLS20 | - 55.2                                 | - 7.70                                    | 647.7           | - 2.28                               | - 2.92                               | + 1.09                               |
| 2014/6/30  | SLS20 | - 71.0                                 | - 9.40                                    | 815.9           | - 1.59                               | - 4.24                               | + 0.34                               |
| 2014/7/31  | SLS20 | - 69.5                                 | - 9.30                                    | 619.0           | - 5.11                               | - 2.30                               | + 0.39                               |
| 2014/8/29  | SLS20 | - 54.4                                 | - 7.30                                    | 1,296.0         | - 1.23                               | - 2.32                               | + 0.43                               |
| 2014/9/30  | SLS20 | - 56.0                                 | - 7.70                                    | 1,564.4         | + 0.80                               | - 1.89                               | + 0.50                               |
| 2014/10/31 | SLS20 | - 59.2                                 | - 9.41                                    | 319.2           | - 4.13                               | - 7.13                               | + 0.49                               |
| 2014/11/27 | SLS20 | - 41.0                                 | - 7.17                                    | 297.8           | - 3.24                               | - 4.09                               | + 0.36                               |
| 2014/12/26 | SLS20 | - 28.7                                 | - 7.07                                    | 168.6           | - 4.35                               | - 5.75                               | + 0.88                               |
| 2012/12/26 | SLS60 | - 38.1                                 | - 8.83                                    | 134.8           | - 1.86                               | + 4.09                               | + 2.74                               |
| 2013/4/30  | SLS60 | - 46.1                                 | - 8.89                                    | 113.4           | - 2.81                               | + 6.71                               | + 3.76                               |
| 2013/7/30  | SLS60 | - 48.7                                 | - 7.73                                    | 272.5           | - 1.86                               | - 2.51                               | + 0.46                               |
| 2013/9/2   | SLS60 | - 49.0                                 | - 7.62                                    | 467.8           | - 0.55                               | - 1.01                               | + 0.37                               |
| 2013/10/31 | SLS60 | - 57.4                                 | - 9.11                                    | 732.9           | - 0.22                               | - 2.66                               | + 0.13                               |
| 2013/12/25 | SLS60 | - 43.9                                 | - 9.63                                    | 85.4            | - 0.51                               | + 5.78                               | + 3.84                               |
| 2014/4/30  | SLS60 | - 62.4                                 | - 10.40                                   | 132.0           | - 0.84                               | + 7.27                               | + 2.62                               |
| 2014/5/30  | SLS60 | - 138.7                                | - 18.40                                   | 143.7           | - 4.04                               | + 6.16                               | + 3.05                               |
| 2014/6/30  | SLS60 | - 140.0                                | - 18.50                                   | 104.9           | - 0.56                               | - 0.43                               | + 1.06                               |
| 2014/7/31  | SLS60 | - 59.0                                 | - 10.15                                   | 71.9            | - 1.35                               | - 2.13                               | + 0.22                               |
| 2014/8/29  | SLS60 | - 57.6                                 | - 8.84                                    | 539.4           | + 0.13                               | + 0.88                               | + 0.09                               |
| 2014/9/30  | SLS60 | - 78.8                                 | - 11.43                                   | 1,055.5         | - 1.03                               | - 1.04                               | + 0.75                               |
| 2014/10/31 | SLS60 | - 51.2                                 | - 7.79                                    | 874.8           | - 1.40                               | - 2.49                               | + 0.34                               |
| 2014/11/27 | SLS60 | - 57.1                                 | - 9.43                                    | 475.3           | - 2.42                               | - 3.89                               | + 0.56                               |
| 2014/12/26 | SLS60 | - 41.4                                 | - 7.06                                    | 249.3           | - 4.73                               | - 4.05                               | + 0.88                               |
